# Supplementary material for: Investigating Multi-Target Antiviral Compounds by Screening of Phytochemicals From Neem (Azadirachta indica) Against PRRSV: A Vetinformatics Approach
Source: Front Vet Sci. 2022 Jun 16;9:854528. doi: 10.3389/fvets.2022.854528 (PMC9244183; doi:10.3389/fvets.2022.854528)
Supplement: Supplementary file 1 [file Table_1.XLSX]

## Sheet: Sheet1
Supplementary Table 1. List of 70 Neem phytochemicals and their binding free energies (Kcal/mol) with CD163-SRCR5, Nsp4 and Nsp10
SN	Compound ID	Binding energy with CD163-SRCR5	Compound ID	Binding energy with Nsp4	Compound ID	Binding energy with Nsp10
1	CID_1886	-6.8	CID_11988279	-8.2	CASID_104522-76-1	-8.7
2	CID_44567124	-6.8	CID_14635659	-8.2	CID_101650342	-8.5
3	CID_15560423	-6.5	CID_1886	-7.7	CID_15560423	-8.5
4	CASID_104522-76-1	-6.2	CASID_104522-76-1	-7.5	CID_101650373	-8.4
5	CID_101289833	-6.2	CID_101289833	-7.4	CID_1886	-8.2
6	CID_101306757	-6.2	CID_5280489	-7.4	CID_184310	-8.1
7	CID_10813969	-6.2	CID_14492795	-7.3	CID_225689	-8.1
8	CID_114923	-6.2	CID_15560423	-7.3	CID_44575793	-8.1
9	CID_52952112	-6.2	CID_225689	-7.3	CID_101289833	-8
10	CID_101650342	-6	CID_52952112	-7.3	CHEMSPIDER_298060	-7.9
11	CID_184310	-6	CID_101277363	-7.2	CID_13875774	-7.9
12	CID_44575793	-6	CID_44575793	-7.2	CID_5280489	-7.9
13	CID_5280489	-6	CASID_105404-75-9	-7.1	CID_52952216	-7.9
14	CHEMSPIDER_156225	-5.8	CID_102090424	-7.1	CID_114923	-7.8
15	CID_102285346	-5.8	CID_122801	-7.1	CID_6442906	-7.8
16	CID_12308714	-5.8	CID_184310	-7.1	CID_10813969	-7.7
17	CID_12308716	-5.8	CID_114923	-7	CID_16126804	-7.7
18	CID_14492795	-5.8	CID_16219576	-7	CID_44567124	-7.7
19	CID_225689	-5.8	CID_10813969	-6.9	CID_52952112	-7.7
20	CASID_105377-74-0	-5.7	CASID_105377-74-0	-6.8	CASID_105404-75-9	-7.6
21	CID_10505484	-5.7	CHEMSPIDER_156225	-6.8	CASID_29803-85-8	-7.6
22	CID_6442906	-5.7	CHEMSPIDER_298060	-6.8	CID_102146586	-7.6
23	CID_9823926	-5.7	CID_10906239	-6.8	CID_102285346	-7.6
24	CASID_105404-75-9	-5.6	CID_11334829	-6.8	CID_52951894	-7.6
25	CID_101425842	-5.6	CID_12303662	-6.8	CID_6450192	-7.6
26	CID_101690	-5.6	CID_12308714	-6.8	CID_9823926	-7.6
27	CID_102090424	-5.6	CID_9547213	-6.8	CID_122801	-7.5
28	CID_10906239	-5.6	CID_12308716	-6.7	CID_12308716	-7.5
29	CID_118701505	-5.6	CID_44567124	-6.7	CID_14492795	-7.5
30	CID_122801	-5.6	CID_5280863	-6.7	CID_52952013	-7.5
31	CID_13875774	-5.6	CID_6442906	-6.7	CASID_105377-74-0	-7.4
32	CID_52951894	-5.6	CID_101306757	-6.6	CASID_106807-34-5	-7.4
33	CID_52952216	-5.6	CID_101650342	-6.6	CID_2263	-7.4
34	CID_9547213	-5.6	CID_102285346	-6.6	CHEMSPIDER_156225	-7.3
35	CASID_29803-85-8	-5.5	CID_101425842	-6.5	CID_10906239	-7.3
36	CHEMSPIDER_298060	-5.5	CID_102146586	-6.4	CID_11988279	-7.3
37	CID_16126804	-5.5	CID_13875774	-6.4	CID_23256847	-7.3
38	CID_24796982	-5.5	CID_23256847	-6.4	CID_24796982	-7.3
39	CID_52951892	-5.5	CID_298061	-6.4	CID_101277363	-7.2
40	CID_101650373	-5.4	CID_5281416	-6.4	CID_101306757	-7.2
41	CID_102146586	-5.4	CID_10134	-6.3	CID_101425842	-7.2
42	CID_11334829	-5.4	CID_10505484	-6.3	CID_102090424	-7.2
43	CID_23256847	-5.4	CID_52951892	-6.3	CID_10505484	-7.2
44	CID_101277363	-5.3	CID_52952216	-6.3	CID_12308714	-7.2
45	CID_10134	-5.3	CID_44715635	-6.2	CID_76316558	-7.2
46	CID_16219576	-5.3	CID_52951894	-6.2	CID_44715635	-7.1
47	CASID_106807-34-5	-5.2	CID_76316558	-6.2	CID_9547213	-7.1
48	CID_11988279	-5.2	CID_9823926	-6.2	CID_11334829	-7
49	CID_14635659	-5.2	CASID_29803-85-8	-6.1	CASID_78916-53-7	-6.9
50	CID_5280863	-5.2	CID_16126804	-6.1	CID_14458886	-6.9
51	CID_52952013	-5.2	CID_6450192	-6.1	CID_52951892	-6.9
52	CID_6450192	-5.2	CASID_106807-34-5	-6	CID_10134	-6.8
53	CID_76316558	-5.2	CASID_78916-53-7	-6	CID_101690	-6.8
54	CID_14458886	-5.1	CID_101690	-6	CID_16219576	-6.8
55	CID_2263	-5.1	CID_102285347	-6	CID_118701505	-6.7
56	CID_91886694	-5.1	CID_52952013	-6	CID_12303662	-6.7
57	CID_298061	-4.9	CID_91886694	-6	CID_298061	-6.6
58	CASID_78916-53-7	-4.8	CID_14458886	-5.9	CID_5280863	-6.6
59	CID_102285347	-4.8	CID_101650373	-5.8	CID_102285347	-6.6
60	CID_124039	-4.8	CID_124039	-5.8	CID_14194026	-6.4
61	CID_14194026	-4.8	CID_14194026	-5.8	CID_91886694	-6.4
62	CID_44715635	-4.8	CID_24796982	-5.8	CID_14635659	-6.3
63	CID_5281416	-4.8	CID_21594790	-5.7	CID_5281416	-6.3
64	CID_12303662	-4.5	CID_118701505	-5.6	CID_124039	-6.2
65	CID_21594790	-4.5	CID_2263	-5.5	CID_21594790	-5.8
66	CID_444539	-4.4	CID_8215	-5.3	CID_444539	-5.5
67	CID_244	-3.6	CID_444539	-4.9	CID_10467	-4.9
68	CID_8215	-3.2	CID_244	-4.5	CID_244	-4.7
69	CID_10467	-2.9	CID_10467	-4.3	CID_8215	-4.2
70	CID_8067	-2.3	CID_8067	-2.9	CID_8067	-3.1
